## Disinhibitory circuitry gates associative synaptic plasticity in olfactory cortex

Martha Canto-Bustos<sup>1,2</sup>, F. Kathryn Friason<sup>1,2</sup>, Constanza Bassi<sup>1</sup>  
and Anne-Marie M. Oswald<sup>1,2,3\*</sup>

<sup>1</sup>Department of Neuroscience, <sup>2</sup>Center for the Neural Basis of Cognition,  
University of Pittsburgh, Pittsburgh, PA, United States, 15213

### Corresponding Author:

Anne-Marie M. Oswald  
Associate Professor  
Department of Neuroscience  
University of Pittsburgh  
A210 Langley Hall  
Pittsburgh, PA, 15260

<sup>3</sup>Current Address  
Department of Neurobiology  
Neuroscience Institute  
University of Chicago  
Abbott Memorial Hall  
947 East 58<sup>th</sup> St. MC0928  
Chicago, IL, USA, 60637  
[amoswald@uchicago.edu](mailto:amoswald@uchicago.edu)

1 **Abstract**

2 Inhibitory microcircuits play an essential role in regulating cortical responses to sensory stimuli.

3 Interneurons that inhibit dendritic or somatic integration in pyramidal neurons act as

4 gatekeepers for neural activity, synaptic plasticity and the formation of sensory representations.

5 Conversely, interneurons that specifically inhibit other interneurons can open gates through

6 disinhibition. In the rodent piriform cortex, relief of dendritic inhibition permits long-term

7 potentiation (LTP) of the recurrent synapses between pyramidal neurons (PNs) thought to

8 underlie ensemble odor representations. We used an optogenetic approach to identify the

9 inhibitory interneurons and disinhibitory circuits that regulate LTP. We focused on three

10 prominent inhibitory neuron classes- somatostatin (SST), parvalbumin (PV), and vasoactive

11 intestinal polypeptide (VIP) interneurons. We find that VIP interneurons inhibit SST interneurons

12 and promote LTP through subthreshold dendritic disinhibition. Alternatively, suppression of PV-

13 interneuron inhibition promotes LTP but requires suprathreshold spike activity. Thus, we have

14 identified two disinhibitory mechanisms to regulate synaptic plasticity during olfactory

15 processing.

16

17

18

19

20

21

22

23

24

25

26

27           Throughout the cortex, the response properties of individual neurons as well as  
28 coordinated ensemble activity are refined by sensory experience. One underlying feature of  
29 experience-dependent plasticity is long-term changes in synaptic strength within cortical circuits.  
30 While the mechanisms underlying excitatory synaptic plasticity have been extensively studied  
31 (Abbott and Nelson 2000, Malenka and Bear 2004), less is known about the role cortical  
32 circuitry plays in gating changes in synaptic strength. Inhibitory interneurons regulate both  
33 dendritic integration and neural activity, two major factors in synaptic plasticity. Thus, inhibitory  
34 circuits can play a key role in the enhancement of synaptic connections (Artinian and Lacaille  
35 2018, Lucas and Clem 2018). In this study, we elucidate the inhibitory and disinhibitory circuit  
36 motifs that gate synaptic plasticity at recurrent excitatory synapses in the olfactory cortex.

37           The anterior piriform cortex (APC) processes olfactory information, and performs both  
38 sensory and associative cortical functions. Located two synapses from the periphery; the APC is  
39 a primary cortical area representing odor inputs. Olfactory receptor neurons in the nose project  
40 to Mitral and Tufted (M/T) neurons in the olfactory bulb (OB)(Mombaerts, Wang et al. 1996).  
41 M/T neurons then project directly to APC and synapse with pyramidal neurons (PNs)(Haberly  
42 and Price 1977). Unlike other primary sensory cortices, APC lacks a topological representation  
43 of odor identity. M/T axons project diffusely and randomly (Sosulski, Bloom et al. 2011, Igarashi,  
44 Ieki et al. 2012) to activate distributed neural ensembles (Illig and Haberly 2003, Rennaker,  
45 Chen et al. 2007, Stettler and Axel 2009). Distributed odor representations are further supported  
46 by uniform intracortical excitatory connectivity across the APC (Franks, Russo et al. 2011). It is  
47 postulated that odor-specific ensembles are constructed by strengthening excitatory synapses  
48 between pyramidal neurons co-activated by odor components (Haberly 2001, Wilson and  
49 Sullivan 2011). In support of this hypothesis, intracortical synapses between PNs are  
50 strengthened following odor learning *in vivo* (Saar, Grossman et al. 2002) and through pairing of  
51 afferent and intracortical stimulation *in vitro* (Kanter and Haberly 1993, Johenning, Beed et al.  
52 2009). Hence, APC circuitry also supports early stage, associative odor processing.

53           The APC is an ideal structure for investigating the circuit and synaptic plasticity  
54 mechanisms that underlie sensory representations. PNs receive compartmentalized excitatory  
55 inputs on their apical dendrites from two distinct fiber tracts. M/T cells afferents synapse distally,  
56 while PN axons form a proximal intracortical fiber tract (Haberly and Price 1977, Haberly and  
57 Price 1978). Co-activation of afferent and intracortical fiber tracts strengthens intracortical  
58 synapses onto PNs through NMDA receptor (R) dependent, associative LTP (Kanter and  
59 Haberly 1993). Further, NMDAR EPSPs and associative LTP induction are facilitated by  
60 dendritic disinhibition by GABA<sub>A</sub> receptor antagonists (Kanter and Haberly 1993, Kanter, Kapur  
61 et al. 1996). While these studies suggest interplay between dendritic inhibition and disinhibition  
62 gates LTP induction at intracortical synapses, the inhibitory circuitry involved has not been  
63 identified.

64           Olfactory stimuli recruit both feedforward and recurrent inhibition onto PNs in APC (Poo  
65 and Isaacson 2009, Poo and Isaacson 2011). Feedforward inhibition is comparatively weak and  
66 diminishes with high frequency stimulation of the afferent pathway, whereas recurrent inhibition  
67 is strong, and increases with stimulation through synaptic facilitation and PN recruitment  
68 (Stokes and Isaacson 2010, Suzuki and Bekkers 2010a, Large, Vogler et al. 2016). Recurrent  
69 inhibition is mediated by inhibitory interneurons that express somatostatin (SST-INs) or  
70 parvalbumin (PV-INs) (Stokes and Isaacson 2010, Suzuki and Bekkers 2010a, Suzuki and  
71 Bekkers 2010b, Large, Kunz et al. 2016). SST-INs inhibit PN apical dendrites proximal to the  
72 soma, and are optimally located to regulate plasticity of intracortical synapses (Suzuki and  
73 Bekkers 2010b, Large, Kunz et al. 2016). PV-INs regulate spike activity and could also impact  
74 LTP through backpropagation (Johanning, Beed et al. 2009). A third class of interneurons-  
75 vasoactive intestinal polypeptide interneurons (VIP-INs); inhibit SST and PV-INs and could  
76 disinhibit pyramidal neurons (Lee, Kruglikov et al. 2013, Pfeffer, Xue et al. 2013, Karnani,  
77 Jackson et al. 2016). VIP-INs are a prominent in APC (Suzuki and Bekkers 2010b) but their  
78 inhibitory connections and function are unknown. We investigated the connectivity and

79 functional roles of SST, PV and VIP-INs in APC. We find that activation of VIP-INs as well as  
80 inactivation of SST-INs or PV-INs promote LTP of intracortical synapses. VIP-INs strongly inhibit  
81 SST-INs during LTP induction, but only weakly inhibit PV-INs and PNs. We provided evidence  
82 for two disinhibitory circuit mechanisms in APC that promote LTP- one acts in the subthreshold  
83 through a VIP-SST-PN pathway; and the other through increases in suprathreshold activity and  
84 PV-IN inhibition.

85

## 86 **Methods:**

87 Mice: VIP-Cre (B6:Viptm1(cre)Zjh/J) , SST-Cre (B6:Sst<sup>tm2.1(cre)</sup>Zjh>/J) and PV-Cre mice  
88 express cre-recombinase (Taniguchi, He et al. 2011). These mice were crossed with Ai32 mice  
89 (B6;129S-Gt ROSA)26Sortm32 (CAG-COP4\*H134R/EYFP)Hze/J) to express channelrhodopsin  
90 (ChR2) or Ai35 mice (B6.129S-Gt(ROSA)26Sortm35.1(CAG- *aop3/GFP*)Hze/J) to express  
91 archaerhodopsin (Arch) (Madisen, Mao et al. 2012). All mice are from Jackson Laboratory. All  
92 animals were bred, handled and treated in manner that was evaluated and approved by the  
93 Animal Care and Use Committee at the University of Pittsburgh IACUC, protocol #17070877.

94 Slice preparation: APC brain slices were prepared from mice aged P19-35. The mice were  
95 anesthetized with isoflurane and the brain was removed and immersed in ice cold oxygenated  
96 (95% O<sub>2</sub>-5% CO<sub>2</sub>) ACSF (in mM: 125 NaCl, 2.5 KCl, 25 NaHCO<sub>3</sub>, 1.25 NaH<sub>2</sub>PO<sub>4</sub>, 1.0 MgCl<sub>2</sub>, 25  
97 Dextrose, 2.5 CaCl<sub>2</sub>) (all chemicals from Sigma, USA unless otherwise stated). Parasagittal  
98 slices (300 μm) were cut on a vibratome (Leica Biosystems) in ice-cold ACSF. The slices were  
99 transferred to warm ACSF (37°C) for 30 min, then 20-22°C for 1 hour, and recorded at 31-35°C.

100 Electrophysiology: Recordings were performed using a MultiClamp 700B amplifier (Molecular  
101 Devices, Union City, CA). Data were low pass filtered (4 kHz) and digitized at 10 kHz using an  
102 ITC-18 (Instrutech) controlled by custom software (Recording Artist,  
103 <https://bitbucket.org/rgerkin/recording-artist>) written in IgorPro (Wavemetrics). Recording

104 pipettes (4-10 M $\Omega$ ) were pulled from borosilicate glass (1.5 mm, outer diameter) on a  
105 Flaming/Brown micropipette puller (Sutter Instruments). The series resistance (<20 M $\Omega$ ) was not  
106 corrected. For PSPs the intracellular solution consisted of (in mM) 130 K-gluconate, 5 KCl, 2  
107 MgCl<sub>2</sub>, 4 ATP-Mg, 0.3 GTP, 10 HEPES, and 10 phosphocreatine, 0.05% biocytin. For IPSC  
108 recordings, Qx-314 was added to the K-gluconate internal (holding potential 0 mV) or Cs-Glu-  
109 Qx solution was used (in mM, 130 Cs-Gluconate, 5 KCl, 2 MgCl<sub>2</sub>, 4 Mg-ATP, 0.3 GTP, 10  
110 HEPES, 10 Phosphocreatine, 1 Qx-314, holding potential +30 mV). Neurons were visualized  
111 using infrared-differential interference contrast microscopy (IR-DIC, Olympus). For all recorded  
112 neurons, subthreshold response properties were obtained using a series of hyperpolarizing and  
113 depolarizing current steps (-50 pA to 50 pA, 1 s duration). Neural identity was confirmed post  
114 hoc using intrinsic properties and biocytin fills.

115 LTP induction: Electrical stimulation was delivered using concentric bipolar electrodes (FHC).  
116 The electrodes were placed in the LOT (L1a) and the L1b/L2 border. Stimuli (100  $\mu$ s pulse  
117 width) were delivered through a stimulus isolation unit. Theta burst stimulation (TBS) of L1a  
118 consisted of 10 bursts of 4 pulses (100 Hz) delivered at 250 ms intervals (Kanter and Haberly  
119 1993). TBS stimulation intensity was set near spike threshold for the recorded neuron. L1b was  
120 stimulated with a single weak pulse delivered between the 3<sup>rd</sup> and 4<sup>th</sup> pulse of each burst.  
121 Stimulation intensity was <30% of the maximum subthreshold EPSP (~1-6 mV). Pre and post  
122 induction test pulses were delivered to L1b every 30 s. Baseline was collected for ~5 min and  
123 LTP was induced within 10 min of patching the neuron. Series resistance and input resistance  
124 were monitored throughout and neurons with deviations greater than +20% from baseline were  
125 excluded from analysis.

126 Optogenetic Stimulation: Shutter controlled full field stimulation with blue (473 nm) or green  
127 (520 nm) light (Prior) was delivered through the epifluorescence pathway of the microscope  
128 (Olympus) using a water-immersion objective (40x). Light intensity (5-10W) was adjusted to

129 induce spike responses (ChR2 activation) or spike suppression (Arch inactivation). Light pulse  
130 duration varied by experiment as indicated.

131 Statistics: All data is presented as mean  $\pm$  SE. Statistical tests were performed using two tailed,  
132 one or two-sample, paired or unpaired Student's t-test as appropriate. Since no pilot studies  
133 were conducted, sample sizes were initially determined based on sample sizes and mean data  
134 from previous similar studies. All major findings of this study have a power greater than 80% at  
135 a 5% level of significance. In cases of small sample sizes (<10) non-parametric tests were used,  
136 including the Mann-Whitney U-test (MWU) for unpaired data and the Wilcoxon Signed Ranks  
137 test (WSR) for paired data. For multiple comparisons we used ANOVA with post hoc Tukey Test  
138 (ANOVA).

139

#### 140 **Results:**

141 We investigated the roles of SST, PV and VIP-INs, in gating associative LTP at intracortical  
142 excitatory synapses onto PNs. Afferent input to PNs arrives via L1a on distal L2 PN dendrites,  
143 while the intracortical fiber tract (L1b) is proximal (**Fig 1A**). L1a and L1b were easily identified  
144 under IR-DIC and independently stimulated using bipolar electrodes. Associative LTP is induced  
145 by pairing L1a and L1b stimulation using a theta burst stimulation (TBS) protocol (Kanter and  
146 Haberly 1993) consistent with respiration coupled M/T spike frequencies (Kepecs, Uchida et al.  
147 2007, Carey and Wachowiak 2011). Briefly, strong TBS of L1a was paired with weak, single  
148 pulse stimulation of L1b (see methods, **Fig 1A**). This L1a+L1b pairing is hereafter denoted  
149 *induction*. L1a-TBS evoked low PN firing rates (FR, 0-5 Hz) and L1b EPSPs ranged from 1-6  
150 mV. Pre and post induction, L1b stimulation was delivered every 30 s. To avoid drift in recording  
151 integrity, potentiation was quantified as the average L1b EPSP amplitude 25-30 min following  
152 induction versus average baseline EPSP amplitude (5 min prior to induction). However,  
153 potentiation typically lasted for the duration of recording (~60 min). Both raw and normalized (to

154 baseline) EPSP amplitude and area were analyzed. PNs with input resistances or membrane  
155 potentials varying more than 20% from baseline were excluded.

156

### 157 ***Disinhibition of PN dendrites promotes LTP***

158 With inhibition intact, the induction protocol did not induce LTP of L1b synapses (in mV,  
159 pre:  $2.8 \pm 0.5$ , post:  $2.9 \pm 0.5$ , p: 0.671, paired t-test, n=12 PNs, **Fig 1B,C, left**). Likewise,  
160 normalized EPSP amplitude and area did not differ significantly from 1 (Amplitude:  $1.0 \pm 0.1$ , p:  
161 0.48; Area:  $1.2 \pm 0.1$ , p: 0.09, one sample t-test, **Fig 1C, right**). To confirm that dendritic  
162 disinhibition promotes LTP, we focally applied the GABA<sub>A</sub> receptor antagonist, Gabazine (GZ,  
163 20  $\mu$ M), to L1b (schematic, **Fig 1D1**). In this case, induction significantly enhanced EPSPs (mV,  
164 Pre:  $1.1 \pm 0.2$ , Post:  $3.5 \pm 1.1$ , p: 0.048 paired t-test, n=**Fig 1B,D**). Normalized EPSP area was  
165 significantly greater than 1 (Area:  $4.8 \pm 1.7$ , p: 0.047, one sample t-test). However, normalized  
166 amplitude did not significantly differ from 1 ( $3.4 \pm 1.7$ , p: 0.058) due to a strongly potentiated  
167 outlier. Absent this point, normalized amplitude is significantly greater than 1 ( $2.4 \pm 0.4$ , p:  
168 0.005, **red \*\***, **Fig. 1D3, Supplemental Table 1**). In a subset of slices from SST-ChR2 mice, GZ  
169 application to L1b blocked optically evoked SST-mediated inhibition (Large, Kunz et al. 2016)  
170 (n=5, **Fig 1E**) and promoted LTP. This suggests that SST-INs provide dendritic inhibition and  
171 may modulate synaptic plasticity.

### 172 ***Inactivation of SST-INs promotes LTP***

173 To confirm a role for SST-mediated inhibition in gating synaptic plasticity, we optically  
174 inactivated SST-INs in slices from SST-Arch mice (see methods) during induction. Light  
175 inactivation reduced SST-IN FR during TBS from  $6.8 \pm 1.2$  Hz to  $1.8 \pm 0.4$  Hz (p<0.05, WSR  
176 test, **Fig 2A2**). In PNs, SST-IN inactivation enhanced EPSP summation and depolarization  
177 during TBS (**Fig 2B1**). Inactivation of SST-INs during induction promotes robust LTP of L1b  
178 synapses (**Fig 2C1-3**). EPSP amplitude was significantly enhanced post induction (in mV, Pre:  
179  $3.0 \pm 0.3$ , Post:  $4.7 \pm 0.45$ , p: 0.007, n=16, paired t-test) and normalized EPSP amplitude and



180 area were significantly greater than 1 (Amplitude:  $1.7 \pm 0.2$ ,  $p$ : 0.005; Area:  $1.8 \pm 0.2$ ,  $p$ : 0.004,  
181 one sample t-test). Antagonism of NMDA receptors (DL-APV, 10 mM, **Fig 1B2**) in conjunction  
182 with light inactivation of SST-INs prevented LTP (**Fig C1, black circles, Supplemental Table**  
183 **1**). These findings demonstrate that SST-IN inhibition regulates NMDA-dependent associative  
184 LTP at L1b intracortical synapses.

185

### 186 ***Inhibition of interneurons by VIP-INs***

187 In other cortices, VIP interneurons inhibit SST-INs and PV-INs (Pfeffer, Xue et al. 2013,  
188 Pi, Hangya et al. 2013). Typically, VIP-cre mice are crossed with mice that express GFP in SST-  
189 INs (GIN-mice) or PV-INs (G42-mice). However, these lines sparsely label SST and PV-INs in  
190 APC (Large, Kunz et al. 2016). Instead, we used intrinsic properties for genetically identified  
191 interneuron classes in APC (Large, Kunz et al. 2016) to identify putative (p) SST-INs and pPV-  
192 INs in slices from VIP-ChR2 mice (**Supplemental Table 2**). Interneurons that could not be  
193 confidently identified were excluded from analysis. Neurons were recorded in three conditions:  
194 voltage clamp with Cs-Gluconate-Qx internal (IPSCs, +30 mV) or K-Gluconate-Qx internal  
195 (IPSCs, 0 mV) and current clamp with K-Gluconate (IPSPs at -50 mV). IPSC recordings were  
196 most reliable with Cs-Glu-Qx and the data presented are from this condition (**Figure 3**). Data  
197 from remaining conditions are presented in **Supplemental Table 2**.

198 VIP-INs were activated by blue light pulses (5 ms) and IPSCs were recorded in  
199 postsynaptic neurons. VIP-INs inhibited nearly all recorded pSST-INs (86%), most pPV-INs  
200 (90%) and PNs (88%). High connectivity with SST and PV cells was expected (Pfeffer, Xue et  
201 al. 2013). However, unexpectedly high PN connections may reflect recording conditions as few  
202 connections were found with K-Glu-QX (27%) or K-Glu (0%) solutions. VIP-INs strongly  
203 inhibited pSST-INs (IPSC amplitude:  $303 \pm 57$  pA,  $n=19$ ) but weakly inhibited pPV-INs ( $35 \pm 5.8$   
204 pA,  $n=9$ ,  $p$ : 0.0008) and PNs ( $61 \pm 14$  pA,  $p$ : 0.001  $n=14$ , ANOVA). To determine if VIP-IN  
205 inhibition can be sustained throughout TBS, light pulses (100 ms duration) were delivered at

206 theta frequency (10 pulses, **Fig 3A2**). We found that IPSC strength decreased by ~30% by the  
207 5<sup>th</sup> pulse in all cell types then stabilized (SST:  $31 \pm 10\%$ ,  $p: 0.002$ ; PV:  $31 \pm 5\%$ ,  $p: 0.06$ ; PC:  $28$   
208  $\pm 12\%$ ,  $p: 0.02$ , paired t-test, **Fig 3B2**).

209 Next, we depolarized pSST-INs to near-threshold membrane potentials (~-55 mV, K-Glu  
210 internal) and evoked strong IPSPs ( $2.02 \pm 0.38$  mV,  $n=18$ , **Fig 3C1**). We could not record IPSPs  
211 in PNs and PV neurons due to a combination of low input resistance and weak VIP-mediated  
212 IPSCs. With suprathreshold depolarization of pSST-INs we found that IPSPs deleted or delayed  
213 spikes by an average of  $77 \pm 26$  ms ( $p: 0.016$ ,  $n=11$ , paired t-test) compared to non-light trials  
214 (**Fig 3C1,3 left**). Finally, pSST-IN spike responses were diminished with theta activation of VIP-  
215 INs during TBS compared to non-light trials (OFF:  $5.0 \pm 0.6$  Hz, ON:  $3.5 \pm 0.5$ ,  $p: 0.002$ ,  $n=11$ ,  
216 paired t-test, **Fig 3C**).

217

### 218 ***Activation of VIP-INs promotes LTP***

219 VIP-to-SST inhibition is a candidate circuit motif for dendritic disinhibition of PNs.  
220 However, without optogenetic activation, VIP-INs are only weakly driven by TBS ( $0.7 \pm 0.6$  Hz,  
221  $n=6$ ). This lack of VIP-IN recruitment is consistent with the inability to induce LTP under control  
222 conditions (**Fig 1B**). Light activation of VIP-INs enhanced FR during TBS ( $14 \pm 4.0$  Hz,  $p<0.05$ ,  
223 WSR test **Fig 4A2**). Surprisingly, PN FR was unaffected by activation of VIP-INs during TBS  
224 (Light OFF:  $6.2 \pm 0.9$  Hz, ON:  $6.0 \pm 1.1$  Hz,  $n=7$ ,  $p>0.05$ , WSR, **Fig 4B1**). Nonetheless,  
225 activating VIP-INs enhanced EPSP summation in PNs during TBS (**Fig 4B2**). Further, activation  
226 of VIP-INs during induction lead to robust LTP (**Fig 4C1**, EPSP amplitude in mV, Pre:  $3.8 \pm 0.8$ ,  
227 Post:  $5.1 \pm 0.90$ ,  $p: 0.002$ ,  $n=10$ , paired t-test). Normalized amplitude and area were significantly  
228  $>1$  post induction (Amplitude:  $1.5 \pm 0.1$ ,  $p: 0.003$ ; Area:  $1.7 \pm 0.1$ ,  $p: 0.0001$ , one sample t-test).  
229 Finally, LTP is blocked in the presence of the NMDAR antagonist, DL-APV (**Fig 4C1**,

230 **Supplemental Table 1**). These findings support a role for a VIP-SST-PN disinhibitory circuit in  
231 gating associative LTP at intracortical synapses.

232

### 233 ***Inactivation of PV-INs promotes LTP***

234 Finally, we investigated whether optogenetic inactivation of PV-INs expressing Arch also  
235 promotes associative LTP (**Fig 5A1**). PV-INs are robustly activated during TBS (**Fig 5A2**) and  
236 light inactivation significantly decreased FR (Light OFF:  $7.2 \pm 2.5$  Hz, ON:  $2.8 \pm 1.7$  Hz,  $n=5$ ,  
237  $p<0.05$ , WSR, **Fig 5A2, right**). In a number of PNs, this enhanced EPSP summation (**Fig 5B1**)  
238 and FR consistent with somatic disinhibition. PN FR appeared greater during PV inactivation  
239 (PV-Arch:  $7.1 \pm 1.7$  Hz) versus manipulation of SST-INs or VIP-INs during TBS but this was not  
240 significant (SST-Arch:  $5.7 \pm 1.4$  Hz; VIP-ChR2:  $3.7 \pm 1.2$  Hz,  $p>0.05$  ANOVA) (**Fig 5B2**). PV-IN  
241 inactivation during induction promoted LTP (**Fig 5C1-C3**, EPSP in mV, Pre:  $2.0 \pm 0.3$ , Post:  $2.8$   
242  $\pm 0.4$ ,  $p: 0.003$ ,  $n=13$ , paired t-test). Normalized amplitude and area were significantly  $>1$  post  
243 induction (Amplitude:  $1.5 \pm 0.1$ ,  $p: 0.004$ ; Area:  $1.6 \pm 0.1$ ,  $p: 0.004$ , one sample t-test). LTP was  
244 blocked in the presence of the NMDAR antagonist, DL-APV (**Fig 5C1, Supplemental Table 1**).  
245 Since PV-INs primarily inhibit somas, PV-inactivation might promote LTP through action  
246 potential (AP) back-propagation into the dendrite (Johanning, Beed et al. 2009). To test this, we  
247 evoked APs in PNs during induction (5 Hz,  $\sim 1$ -2 APs per theta burst) without manipulating  
248 inhibition. This enhanced normalized EPSP amplitudes 25-30 min post pairing ( $1.4 \pm 0.1$ ,  $p: <$   
249  $0.05$ ,  $n=6$ , WSR, **Fig 5D1,2** gray triangles). Conversely, in a subset of PNs, LTP was not  
250 induced with inactivation of PV-INs resulting PN FRs that were  $<2$  Hz (Norm. Amp:  $1.0 \pm 0.1$ ,  
251  $p:> 0.05$ ,  $n=8$ , WSR, **Fig 5D1,2** open circles). To determine if APs are necessary, we  
252 investigated the subsets of PNs with low FR ( $<2$  Hz) during SST-IN inactivation or VIP-IN  
253 activation. Despite low firing rates during induction, there was robust LTP in these PNs (Norm.  
254 Amplitude SST:  $1.7 \pm 0.3$ ,  $p: <0.05$ ,  $n=8$ ; VIP:  $1.6 \pm 0.1$ ,  $p: <0.05$ ,  $n=7$ , WSR, **Fig 5D3**). This  
255 suggests that relief of dendritic inhibition through a VIP-to-SST-to-PN circuit is sufficient to

256 promote LTP without high FR. However, in the absence of dendritic disinhibition, LTP can be  
257 induced through backpropagation if PN firing rate is sufficiently high (>5 Hz). These two  
258 mechanisms could work in concert to promote ensemble formation in APC.

259

## 260 **Discussion**

261 It has been hypothesized that odor ensembles are formed through associative plasticity  
262 between co-activated pyramidal neurons (Haberly 2001, Wilson and Sullivan 2011). Intracortical  
263 synapses are stronger in animals that have learned an olfactory discrimination task (Saar,  
264 Grossman et al. 2002, Saar, Reuveni et al. 2012) and the induction of associative LTP *in vitro* is  
265 occluded in animals that have learned tasks (Lebel, Grossman et al. 2001). This capacity for  
266 enhancement as well as highly recurrent excitation (Poo and Isaacson 2011) necessitates  
267 strong inhibition to regulate neural activity (Luna and Schoppa 2008, Poo and Isaacson 2011,  
268 Bolding and Franks 2018) and synaptic plasticity (Kanter and Haberly 1993, Kanter, Kapur et al.  
269 1996). Our present findings are consistent with a VIP->SST->PN circuit that transiently  
270 disinhibits PN dendrites to promote synaptic plasticity during odor learning while overall  
271 inhibition remains intact. This LTP does not depend on high post-synaptic spike rates, but  
272 backpropagation could contribute to synaptic enhancement.

273         Associative LTP at intracortical synapses within APC is well-characterized (Stripling,  
274 Patneau et al. 1988, Kanter and Haberly 1993, Poo and Isaacson 2007). Strong afferent  
275 excitation depolarizes apical PN dendrites and promotes NMDA receptor dependent  
276 potentiation of co-activated intracortical synapses. However, stimulation of both pathways also  
277 recruits strong inhibition and LTP is rarely induced in the absence of GABA<sub>A</sub>R antagonists  
278 (Kanter and Haberly 1993). We reproduced previous findings (Kanter, Kapur et al. 1996, Kumar,  
279 Schiff et al. 2018), and demonstrate that SST-IN mediated dendritic inhibition is blocked by  
280 dendritic application of Gabazine. We further demonstrate that a transient decrease in SST-IN  
281 activity at an opportune moment, i.e. during TBS, is sufficient to promote LTP. Thus, a circuit

282 mechanism that transiently inhibits SST-INs can gate synaptic plasticity. Throughout the cortex,  
283 VIP-INs inhibit SST-INs and potentially disinhibit PNs (Lee, Kruglikov et al. 2013, Pfeffer, Xue et  
284 al. 2013, Kamani, Jackson et al. 2016). Here, we show that VIP-INs strongly inhibit putative  
285 SST-INs, but weakly inhibit putative PV-INs as well as PNs. Further, optogenetic activation of  
286 VIP-INs decreases SST-IN spike responses during TBS and is sufficient gate associative LTP.  
287 These findings provide strong support that a VIP->SST->PN disinhibitory circuit gates  
288 intracortical synaptic plasticity in APC.

289 Our study complements a recent study in somatosensory cortex that used  
290 chemogenetics to inhibit VIP-INs or SST-INs and prevent or promote LTP induction respectively  
291 (Williams and Holtmaat 2019). Together, these two studies support a common VIP->SST->PN  
292 disinhibitory circuit motif regulates synaptic plasticity across cortical areas. However,  
293 pharmacological and chemogenetic methods of disinhibition could have long-term and/or non-  
294 specific effects on inhibition and network excitability. A benefit of optogenetics, is the ability to  
295 isolate the influence of disinhibition to the brief time window when afferent and intracortical  
296 pathways are co-activated. Thus, transient dendritic disinhibition is sufficient to gate the  
297 cascade of intracellular mechanisms underlying synaptic enhancement. Circuit mechanisms that  
298 provide well-timed input to VIP cells in conjunction with odor sampling could play a key role in  
299 odor learning and ensemble formation.

300 Interestingly, VIP-INs are not recruited by pairing afferent and intracortical stimulation,  
301 this may underlie the inability induce associative LTP with inhibition intact (**Fig 1**). At present, it  
302 is not known how VIP-INs in APC are recruited. In other cortices, VIP-IN activity is enhanced by  
303 arousal, locomotion, task engagement or reward (Lee, Kruglikov et al. 2013, Pi, Hangya et al.  
304 2013, Fu, Tucciarone et al. 2014, Jackson, Ayzenshtat et al. 2016), either through additional  
305 excitatory drive from other cortical areas (Lee, Kruglikov et al. 2013, Williams and Holtmaat  
306 2019) or through neuromodulation (Porter, Cauli et al. 1999, Lee, Hjerling-Leffler et al. 2010,  
307 Alitto and Dan 2012, Kuchibhotla, Gill et al. 2017, Pronneke, Witte et al. 2019). The APC

308 receives input from higher cortices including orbitofrontal cortex (Illig 2005) and  
309 neuromodulatory centers (Zaborszky, Carlsen et al. 1986, Linster, Wyble et al. 1999). Both of  
310 these pathways have been implicated in olfactory learning and plasticity (Patil, Linster et al.  
311 1998, Patil and Hasselmo 1999, Linster, Maloney et al. 2003, Li, Luxenberg et al. 2006, Chapuis  
312 and Wilson 2013, Cohen, Wilson et al. 2015, Strauch and Manahan-Vaughan 2018). Future  
313 studies are needed to ascertain the potential links between descending excitation and/or  
314 neuromodulation, the recruitment of VIP-INs, and the gating of synaptic plasticity during  
315 olfactory processing.

316 Finally, an unexpected finding was that PN firing rates do not change when VIP-INs are  
317 activated during LTP induction. Likewise, inactivation of SST-INs minimally influenced PN firing  
318 rates but promoted LTP. Inhibition from SST-INs typically suppresses PN firing rates in APC  
319 (Sturgill and Isaacson 2015). Conversely, disinhibition through a VIP-SST-PN circuit would be  
320 expected to enhance PN firing rates (Pi, Hangya et al. 2013, Fu, Tucciarone et al. 2014,  
321 Karnani, Jackson et al. 2016). Our findings suggest that VIP-SST-PN disinhibition can impact  
322 ensemble responses at a subthreshold level in the dendrites. Conversely, inactivation of PV-INs  
323 also promotes LTP but requires higher PN firing rates during LTP induction. Artificially  
324 increasing postsynaptic firing rates during TBS promotes LTP through spike backpropagation  
325 (Bathellier, Margrie et al. 2009). It is conceivable that VIP-INs also gate plasticity through a VIP-  
326 PV-PN circuit. However, we predict this circuit motif contributes minimally to LTP induction for  
327 two reasons. First, VIP-INs weakly inhibit PV-INs. And second, SST-INs strongly inhibit PV-INs  
328 in APC and other cortices (Pfeffer, Xue et al. 2013, Xu, Jeong et al. 2013, Large, Kunz et al.  
329 2016). Driving VIP-INs and inhibiting SST-INs, likely increases PV-IN activity and somatic  
330 inhibition resulting in minimal changes in PN firing rates. Altogether, we show that LTP can be  
331 induced at intracortical synapses through spike dependent and independent pathways mediated  
332 through PV-INs and SST-INs respectively.

333            Though many previous studies have focused on the influence of disinhibitory circuits on  
334 FR or behavior, our study highlights a role for disinhibition in the subthreshold dynamics that  
335 gate long-term plasticity. We have elucidated two potential circuit mechanisms to promote  
336 intracortical synaptic plasticity and the formation of olfactory representations. Specifically, our  
337 findings suggest that the VIP-SST-PN circuit motif plays a central role in gating synaptic  
338 plasticity in PN dendrites. However, additional circuit mechanisms that regulate PV-IN activity  
339 could secondarily gate LTP through suprathreshold mechanisms. These findings demonstrate  
340 the challenge of the delineating roles for the individual circuit motifs that are nested in complex  
341 neural networks. It remains to be determined if these mechanisms work in concert, or at  
342 different stages of afferent and recurrent olfactory processing.

343

344

345

346

347

348

349

350

351

352

353

354

355

356

357

358

359 **Figure 1: Associative LTP of intracortical synapses is gated by dendritic disinhibition.**  
360 **A)** Schematic of APC circuit and stimulation paradigm. Strong (s) TBS of afferents (L1a) is  
361 paired with weak (w) single-pulses at the intracortical pathway (L1b). **B)** Normalized EPSP  
362 amplitude pre (-5 to 0 min) and post induction (gray box) with inhibition intact (black) or with  
363 dendritic application of Gabazine (GZ, brown). **C)** Inhibition intact: L1b average EPSP amplitude  
364 25-30 min post induction (black circles) compared to baseline (Pre, open circles). Right:  
365 Normalized EPSP amplitude, area and input resistance ( $R_{in}$ ). **D1)** Schematic of GZ at PN  
366 dendrites. **D2)** Left: L1b EPSP pre (black) and post (brown) induction with GZ. Right: L1b EPSP  
367 amplitude post (brown circles) versus baseline (open circles). **D3)** Normalized EPSP area is  
368 significantly greater than 1 (\*p: 0.047). Amplitude is significantly >1 in absence of outlier (red  
369 circle, \*\* p: 0.005). **E)** GZ blocks optically evoked IPSPs (reversed at -85 mV) from SST-ChR2  
370 mice. Left: IPSPs prior to GZ application (black), at baseline (magenta) and post pairing (pink,  
371 time points indicated by arrows in Fig 1B). Right: IPSPs were significantly diminished (\*\*p:  
372 0.002) by GZ application to a stable baseline (pre, magenta) that remained post pairing (post,  
373 pink).

374

375 **Figure 2: SST-interneuron inactivation promotes associative LTP. A1)** Schematic: SST-  
376 INs express Archaeorhodopsin (Arch). **A2)** SST-IN responses during TBS in control (black) and  
377 inactivated (green) conditions (\*p<0.05, WSR test). **B)** PN responses for a single TBS burst.  
378 **Left :** Inactivation of SST-INs enhanced PN depolarization (green vs. black trace). **Right:**  
379 Depolarization during SST-IN inactivation (green) is reduced by APV (gray trace). **C1)**  
380 Normalized EPSP amplitude following pairing with SST-IN inactivation (magenta circles). LTP  
381 is blocked by APV (black). **C2)** EPSP amplitudes were enhanced post pairing (magenta trace,  
382 filled circles) compared to baseline (black trace, open circles, \*\*p: 0.007, paired t-test). **C3)**  
383 Normalized EPSP amplitude (\*\*p: 0.005) and area (\*\*p: 0.004, one sample t-test) were >1 post  
384 pairing.



385 **Figure 3: Inhibition by VIP-interneurons in piriform cortex. A1)** VIP-INs express ChR2.  
386 Optically evoked IPSCs were recorded in putative(p) pSST-INs (magenta), pPV-INs (blue) and  
387 PNs (black). **A2)** Responses of the same neurons (A1) to ten light pulses (100 ms duration, 4  
388 Hz). **B1)** IPSC amplitude was stronger in pSST-INs versus pPV-INs (\*p:0.014) or PNs (\*p:0.042,  
389 ANOVA). **B2)** In pSST-INs, IPSC amplitude diminishes by the 5<sup>th</sup> pulse of theta stimulation (\*\*p:  
390 0.009, paired t-test). **C1)** IPSCs from VIP-INs delay pSST-IN spike responses during  
391 suprathreshold depolarization (4 overlaid traces) **Left:** Control, **Right:** activation of VIP-INs (100  
392 ms pulse, blue). Magenta trace: VIP-IN mediated IPSC during subthreshold depolarization. **C2)**  
393 Interspike interval (ISI) was significantly increased during optical activation of VIP-INs (blue  
394 circles, p: 0.016, paired t-test, n=11) compared to light off trials (black circles). **D1)** Spike  
395 responses in pSST-INs during TBS in control (magenta trace) and during pulsed light (blue  
396 trace). **D2)** pSST-IN firing rates decreased during TBS on light trials (blue) versus control (black  
397 circles, p:0.002, paired t-test, n=11).

398

399 **Figure 4: VIP-interneuron activation promotes associative LTP. A1)** Circuit schematic: VIP-  
400 INs express ChR2 and were activated using theta pulsed light during L1a+L1b pairing. **A2)** VIP-  
401 IN responses during TBS without (black) and with light (blue). FRs increase during pairing with  
402 light (blue circles, p<0.05, WSR, n=7). **B1)** VIP-IN activation did not increase PN FR during  
403 pairing (p>0.05, WSR, n=5). **B2)** Top: Activation of VIP-INs enhanced PN depolarization during  
404 TBS stimulation (blue vs. black trace). Bottom: PN depolarization during VIP-IN activation (blue  
405 trace) is reduced by APV (gray trace). **C1)** Normalized EPSP amplitude pre and post pairing  
406 with VIP-IN activation (green circles). LTP is blocked by APV (black). **C2)** EPSP amplitudes  
407 were enhanced 25 min post pairing (green trace, filled circles) compared to baseline (black  
408 trace, open circles, \*\*p: 0.002, paired t-test). **C3)** Normalized EPSP amplitude (\*\*p: 0.003) and  
409 area (\*\*p: 0.0001, one sample t-test) were >1 post pairing.

410

411 **Figure 5: PV-interneuron inactivation during induction promotes associative LTP. A1)**  
412 Schematic of inactivation of PV-Arch interneurons during induction. **A2)** Decreased PV-IN  
413 spiking during inactivation (green) compared to control (black, \* $p < 0.05$ , WSR,  $n=5$ ). **B1)** PV-IN  
414 inactivation enhanced PN depolarization during TBS (green vs. black trace). **B2)** PN firing rates  
415 during induction with PV-IN (blue) or SST-IN (magenta) inactivation or VIP-IN activation (green).  
416 **C1)** Normalized EPSP amplitude with PV-IN inactivation (blue) or inactivation plus APV (black).  
417 **C2)** Enhancement of EPSP amplitude 25-30 min post induction (blue trace, filled circles)  
418 compared to baseline (black trace, open circles, \*\* $p$ : 0.003, paired t-test). **C3)** Normalized  
419 EPSP amplitude (\*\* $p$ : 0.004) and area (\*\* $p$ : 0.004, 1 sample t-test) were  $>1$ . **D1)** Normalized  
420 EPSP amplitude in two conditions- 1) inhibition intact and evoked backpropagating APs in the  
421 PN during induction (FR $>5$  Hz, gray triangles,  $n=6$ ) and 2) PV-IN inactivation and PN FR  $<2$  Hz  
422 during induction (open blue circles,  $n=8$ ). **D2)** Normalized EPSP amplitude 25-30 min post  
423 induction with PV-IN inactivation for low PN FR ( $<2$ Hz, open circles), high PN FR ( $>5$ Hz, solid  
424 circles, \*  $p$ :  $<0.05$ , WSR) or evoked backpropagation (BP $>5$ Hz, gray triangles, \*  $p$ :  $<0.05$ , WSR).  
425 **D3)** Normalized EPSP amplitude 25-30 min post induction (left axis) conditioned on  $<2$  Hz FR in  
426 PNs (right axis, squares). Shown for PV-IN inactivation (open blue circles), SST-IN inactivation,  
427 (solid magenta, \*  $p$ :  $<0.05$ , WSR) or VIP-IN activation (green circles, \*  $p$ :  $<0.05$ , WSR). Average  
428 firing rate for each group is also shown (right axis, mean  $\pm$  SE, squares).  
429  
430  
431  
432  
433  
434  
435  
436

437 **References**

- 438 Abbott, L. F. and S. B. Nelson (2000). "Synaptic plasticity: taming the beast." Nat Neurosci **3**  
439 **Suppl:** 1178-1183.
- 440 Alitto, H. J. and Y. Dan (2012). "Cell-type-specific modulation of neocortical activity by basal  
441 forebrain input." Front Syst Neurosci **6**: 79.
- 442 Artinian, J. and J. C. Lacaille (2018). "Disinhibition in learning and memory circuits: New  
443 vistas for somatostatin interneurons and long-term synaptic plasticity." Brain Res Bull **141**:  
444 20-26.
- 445 Bathellier, B., T. W. Margrie and M. E. Larkum (2009). "Properties of piriform cortex  
446 pyramidal cell dendrites: implications for olfactory circuit design." J Neurosci **29**(40):  
447 12641-12652.
- 448 Bolding, K. A. and K. M. Franks (2018). "Recurrent cortical circuits implement  
449 concentration-invariant odor coding." Science **361**(6407).
- 450 Carey, R. M. and M. Wachowiak (2011). "Effect of sniffing on the temporal structure of  
451 mitral/tufted cell output from the olfactory bulb." J Neurosci **31**(29): 10615-10626.
- 452 Chapuis, J. and D. A. Wilson (2013). "Cholinergic modulation of olfactory pattern  
453 separation." Neurosci Lett **545**: 50-53.
- 454 Cohen, Y., D. A. Wilson and E. Barkai (2015). "Differential modifications of synaptic weights  
455 during odor rule learning: dynamics of interaction between the piriform cortex with lower  
456 and higher brain areas." Cereb Cortex **25**(1): 180-191.
- 457 Franks, K. M., M. J. Russo, D. L. Sosulski, A. A. Mulligan, S. A. Siegelbaum and R. Axel (2011).  
458 "Recurrent circuitry dynamically shapes the activation of piriform cortex." Neuron **72**(1):  
459 49-56.
- 460 Fu, Y., J. M. Tucciarone, J. S. Espinosa, N. Sheng, D. P. Darcy, R. A. Nicoll, Z. J. Huang and M. P.  
461 Stryker (2014). "A cortical circuit for gain control by behavioral state." Cell **156**(6): 1139-  
462 1152.
- 463 Haberly, L. B. (2001). "Parallel-distributed processing in olfactory cortex: new insights  
464 from morphological and physiological analysis of neuronal circuitry." Chem Senses **26**(5):  
465 551-576.

466 Haberly, L. B. and J. L. Price (1977). "The axonal projection patterns of the mitral and tufted  
467 cells of the olfactory bulb in the rat." Brain Res **129**(1): 152-157.

468 Haberly, L. B. and J. L. Price (1978). "Association and commissural fiber systems of the  
469 olfactory cortex of the rat. II. Systems originating in the olfactory peduncle." J Comp Neurol  
470 **181**(4): 781-807.

471 Igarashi, K. M., N. Ieki, M. An, Y. Yamaguchi, S. Nagayama, K. Kobayakawa, R. Kobayakawa,  
472 M. Tanifuji, H. Sakano, W. R. Chen and K. Mori (2012). "Parallel mitral and tufted cell  
473 pathways route distinct odor information to different targets in the olfactory cortex." J  
474 Neurosci **32**(23): 7970-7985.

475 Illig, K. R. (2005). "Projections from orbitofrontal cortex to anterior piriform cortex in the  
476 rat suggest a role in olfactory information processing." J Comp Neurol **488**(2): 224-231.

477 Illig, K. R. and L. B. Haberly (2003). "Odor-evoked activity is spatially distributed in  
478 piriform cortex." J Comp Neurol **457**(4): 361-373.

479 Jackson, J., I. Ayzenshtat, M. M. Karnani and R. Yuste (2016). "VIP+ interneurons control  
480 neocortical activity across brain states." J Neurophysiol **115**(6): 3008-3017.

481 Johenning, F. W., P. S. Beed, T. Trimbuch, M. H. Bendels, J. Winterer and D. Schmitz (2009).  
482 "Dendritic compartment and neuronal output mode determine pathway-specific long-term  
483 potentiation in the piriform cortex." The Journal of Neuroscience **29**(43): 13649-13661.

484 Kanter, E. D. and L. B. Haberly (1993). "Associative long-term potentiation in piriform  
485 cortex slices requires GABAA blockade." J Neurosci **13**(6): 2477-2482.

486 Kanter, E. D., A. Kapur and L. B. Haberly (1996). "A dendritic GABAA-mediated IPSP  
487 regulates facilitation of NMDA-mediated responses to burst stimulation of afferent fibers in  
488 piriform cortex." J Neurosci **16**(1): 307-312.

489 Karnani, M. M., J. Jackson, I. Ayzenshtat, A. Hamzehei Sichani, K. Manoocheri, S. Kim and R.  
490 Yuste (2016). "Opening Holes in the Blanket of Inhibition: Localized Lateral Disinhibition  
491 by VIP Interneurons." J Neurosci **36**(12): 3471-3480.

492 Kepecs, A., N. Uchida and Z. F. Mainen (2007). "Rapid and precise control of sniffing during  
493 olfactory discrimination in rats." J Neurophysiol **98**(1): 205-213.

494 Kuchibhotla, K. V., J. V. Gill, G. W. Lindsay, E. S. Papadoyannis, R. E. Field, T. A. Sten, K. D.  
495 Miller and R. C. Froemke (2017). "Parallel processing by cortical inhibition enables context-  
496 dependent behavior." Nat Neurosci **20**(1): 62-71.

497 Kumar, A., O. Schiff, E. Barkai, B. W. Mel, A. Polog-Polsky and J. Schiller (2018). "NMDA  
498 spikes mediate amplification of inputs in the rat piriform cortex." Elife **7**.

499 Large, A. M., N. A. Kunz, S. L. Mielo and A. M. Oswald (2016). "Inhibition by Somatostatin  
500 Interneurons in Olfactory Cortex." Front Neural Circuits **10**: 62.

501 Large, A. M., N. W. Vogler, S. Mielo and A. M. Oswald (2016). "Balanced feedforward  
502 inhibition and dominant recurrent inhibition in olfactory cortex." Proc Natl Acad Sci U S A  
503 **113**(8): 2276-2281.

504 Lebel, D., Y. Grossman and E. Barkai (2001). "Olfactory learning modifies predisposition for  
505 long-term potentiation and long-term depression induction in the rat piriform (olfactory)  
506 cortex." Cereb Cortex **11**(6): 485-489.

507 Lee, S., J. Hjerling-Leffler, E. Zaghera, G. Fishell and B. Rudy (2010). "The largest group of  
508 superficial neocortical GABAergic interneurons expresses ionotropic serotonin receptors."  
509 The Journal of Neuroscience **30**(50): 16796-16808.

510 Lee, S., I. Kruglikov, Z. J. Huang, G. Fishell and B. Rudy (2013). "A disinhibitory circuit  
511 mediates motor integration in the somatosensory cortex." Nat Neurosci **16**(11): 1662-  
512 1670.

513 Li, W., E. Luxenberg, T. Parrish and J. A. Gottfried (2006). "Learning to smell the roses:  
514 experience-dependent neural plasticity in human piriform and orbitofrontal cortices."  
515 Neuron **52**(6): 1097-1108.

516 Linster, C., M. Maloney, M. Patil and M. E. Hasselmo (2003). "Enhanced cholinergic  
517 suppression of previously strengthened synapses enables the formation of self-organized  
518 representations in olfactory cortex." Neurobiol Learn Mem **80**(3): 302-314.

519 Linster, C., B. P. Wyble and M. E. Hasselmo (1999). "Electrical stimulation of the horizontal  
520 limb of the diagonal band of Broca modulates population EPSPs in piriform cortex." J  
521 Neurophysiol **81**(6): 2737-2742.

522 Lucas, E. K. and R. L. Clem (2018). "GABAergic interneurons: The orchestra or the  
523 conductor in fear learning and memory?" Brain Res Bull **141**: 13-19.

524 Luna, V. M. and N. E. Schoppa (2008). "GABAergic circuits control input-spike coupling in  
525 the piriform cortex." J Neurosci **28**(35): 8851-8859.

526 Madisen, L., T. Mao, H. Koch, J. M. Zhuo, A. Berenyi, S. Fujisawa, Y. W. Hsu, A. J. Garcia, 3rd, X.  
527 Gu, S. Zanella, J. Kidney, H. Gu, Y. Mao, B. M. Hooks, E. S. Boyden, G. Buzsaki, J. M. Ramirez, A.

528 R. Jones, K. Svoboda, X. Han, E. E. Turner and H. Zeng (2012). "A toolbox of Cre-dependent  
529 optogenetic transgenic mice for light-induced activation and silencing." Nat Neurosci  
530 **15**(5): 793-802.

531 Malenka, R. C. and M. F. Bear (2004). "LTP and LTD: an embarrassment of riches." Neuron  
532 **44**(1): 5-21.

533 Mombaerts, P., F. Wang, C. Dulac, S. K. Chao, A. Nemes, M. Mendelsohn, J. Edmondson and R.  
534 Axel (1996). "Visualizing an olfactory sensory map." Cell **87**(4): 675-686.

535 Patil, M. M. and M. E. Hasselmo (1999). "Modulation of inhibitory synaptic potentials in the  
536 piriform cortex." J Neurophysiol **81**(5): 2103-2118.

537 Patil, M. M., C. Linster, E. Lubenov and M. E. Hasselmo (1998). "Cholinergic agonist  
538 carbachol enables associative long-term potentiation in piriform cortex slices." J  
539 Neurophysiol **80**(5): 2467-2474.

540 Pfeffer, C. K., M. Xue, M. He, Z. J. Huang and M. Scanziani (2013). "Inhibition of inhibition in  
541 visual cortex: the logic of connections between molecularly distinct interneurons." Nat  
542 Neurosci **16**(8): 1068-1076.

543 Pi, H. J., B. Hangya, D. Kvitsiani, J. I. Sanders, Z. J. Huang and A. Kepecs (2013). "Cortical  
544 interneurons that specialize in disinhibitory control." Nature **503**(7477): 521-524.

545 Poo, C. and J. S. Isaacson (2007). "An early critical period for long-term plasticity and  
546 structural modification of sensory synapses in olfactory cortex." J Neurosci **27**(28): 7553-  
547 7558.

548 Poo, C. and J. S. Isaacson (2009). "Odor representations in olfactory cortex: "sparse" coding,  
549 global inhibition, and oscillations." Neuron **62**(6): 850-861.

550 Poo, C. and J. S. Isaacson (2011). "A major role for intracortical circuits in the strength and  
551 tuning of odor-evoked excitation in olfactory cortex." Neuron **72**(1): 41-48.

552 Porter, J. T., B. Cauli, K. Tsuzuki, B. Lambolez, J. Rossier and E. Audinat (1999). "Selective  
553 excitation of subtypes of neocortical interneurons by nicotinic receptors." The Journal of  
554 Neuroscience **19**(13): 5228-5235.

555 Pronneke, A., M. Witte, M. Mock and J. F. Staiger (2019). "Neuromodulation Leads to a  
556 Burst-Tonic Switch in a Subset of VIP Neurons in Mouse Primary Somatosensory (Barrel)  
557 Cortex." Cereb Cortex.

558 Rennaker, R. L., C. F. Chen, A. M. Ruyle, A. M. Sloan and D. A. Wilson (2007). "Spatial and  
559 temporal distribution of odorant-evoked activity in the piriform cortex." J Neurosci **27**(7):  
560 1534-1542.

561 Saar, D., Y. Grossman and E. Barkai (2002). "Learning-induced enhancement of  
562 postsynaptic potentials in pyramidal neurons." J Neurophysiol **87**(5): 2358-2363.

563 Saar, D., I. Reuveni and E. Barkai (2012). "Mechanisms underlying rule learning-induced  
564 enhancement of excitatory and inhibitory synaptic transmission." J Neurophysiol **107**(4):  
565 1222-1229.

566 Sosulski, D. L., M. L. Bloom, T. Cutforth, R. Axel and S. R. Datta (2011). "Distinct  
567 representations of olfactory information in different cortical centres." Nature **472**(7342):  
568 213-216.

569 Stettler, D. D. and R. Axel (2009). "Representations of odor in the piriform cortex." Neuron  
570 **63**(6): 854-864.

571 Stokes, C. C. and J. S. Isaacson (2010). "From dendrite to soma: dynamic routing of  
572 inhibition by complementary interneuron microcircuits in olfactory cortex." Neuron **67**(3):  
573 452-465.

574 Strauch, C. and D. Manahan-Vaughan (2018). "In the Piriform Cortex, the Primary Impetus  
575 for Information Encoding through Synaptic Plasticity Is Provided by Descending Rather  
576 than Ascending Olfactory Inputs." Cereb Cortex **28**(2): 764-776.

577 Stripling, J. S., D. K. Patneau and C. A. Gramlich (1988). "Selective long-term potentiation in  
578 the pyriform cortex." Brain Res **441**(1-2): 281-291.

579 Sturgill, J. F. and J. S. Isaacson (2015). "Somatostatin cells regulate sensory response fidelity  
580 via subtractive inhibition in olfactory cortex." Nat Neurosci **18**(4): 531-535.

581 Suzuki, N. and J. M. Bekkers (2010a). "Distinctive classes of GABAergic interneurons  
582 provide layer-specific phasic inhibition in the anterior piriform cortex." Cereb Cortex  
583 **20**(12): 2971-2984.

584 Suzuki, N. and J. M. Bekkers (2010b). "Inhibitory neurons in the anterior piriform cortex of  
585 the mouse: classification using molecular markers." J Comp Neurol **518**(10): 1670-1687.

586 Taniguchi, H., M. He, P. Wu, S. Kim, R. Paik, K. Sugino, D. Kvitsiani, Y. Fu, J. Lu, Y. Lin, G.  
587 Miyoshi, Y. Shima, G. Fishell, S. B. Nelson and Z. J. Huang (2011). "A resource of Cre driver

588 lines for genetic targeting of GABAergic neurons in cerebral cortex." Neuron **71**(6): 995-  
589 1013.

590 Williams, L. E. and A. Holtmaat (2019). "Higher-Order Thalamocortical Inputs Gate Synaptic  
591 Long-Term Potentiation via Disinhibition." Neuron **101**(1): 91-102 e104.

592 Wilson, D. A. and R. M. Sullivan (2011). "Cortical processing of odor objects." Neuron **72**(4):  
593 506-519.

594 Xu, H., H. Y. Jeong, R. Tremblay and B. Rudy (2013). "Neocortical somatostatin-expressing  
595 GABAergic interneurons disinhibit the thalamorecipient layer 4." Neuron **77**(1): 155-167.

596 Zaborszky, L., J. Carlsen, H. R. Brashear and L. Heimer (1986). "Cholinergic and GABAergic  
597 afferents to the olfactory bulb in the rat with special emphasis on the projection neurons in  
598 the nucleus of the horizontal limb of the diagonal band." J Comp Neurol **243**(4): 488-509.  
599



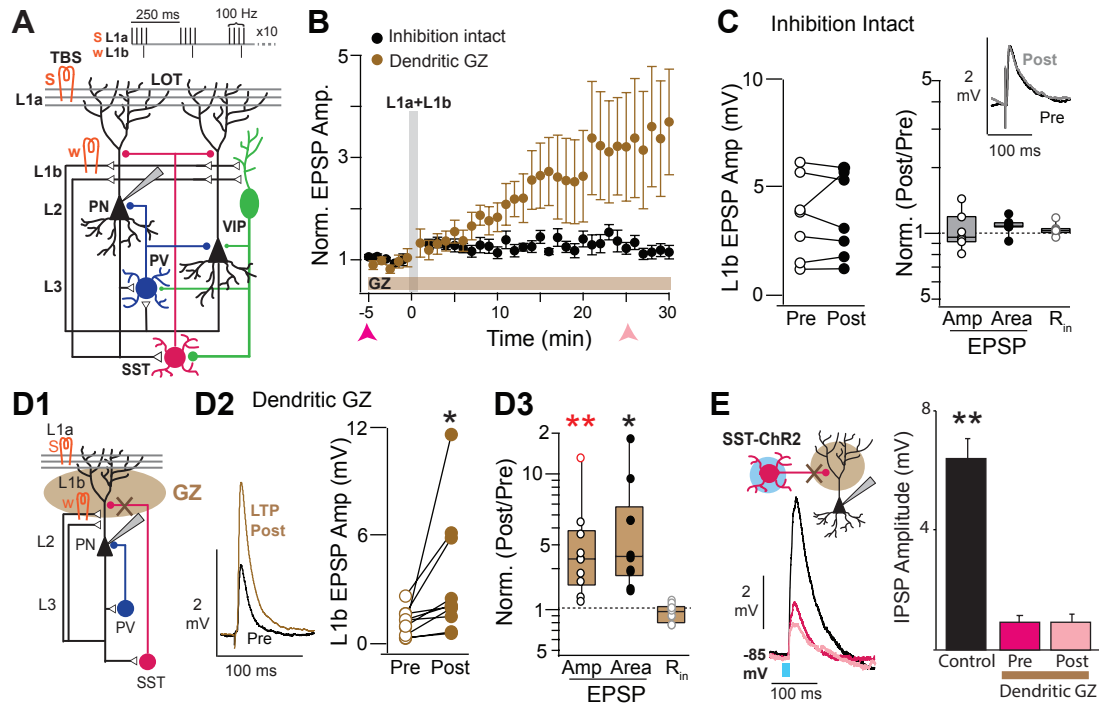

Figure 1: Associative LTP of intracortical synapses is gated by dendritic disinhibition.

A) Schematic of APC circuit and stimulation paradigm. Strong (s) TBS of afferents (L1a) is paired with weak (w) single-pulses at the intracortical pathway (L1b). B) Normalized EPSP amplitude pre (-5 to 0 min) and post induction (gray box) with inhibition intact (black) or with dendritic application of Gabazine (GZ, brown). C) Inhibition intact: L1b average EPSP amplitude 25-30 min post induction (black circles) compared to baseline (Pre, open circles). Right: Normalized EPSP amplitude, area and input resistance ( $R_{in}$ ). D1) Schematic of GZ at PN dendrites. D2) Left: L1b EPSP pre (black) and post (brown) induction with GZ. Right: L1b EPSP amplitude post (brown circles) versus baseline (open circles). D3) Normalized EPSP area is significantly greater than 1 (\* $p$ : 0.047). Amplitude is significantly >1 in absence of outlier (red circle, \*\* $p$ : 0.005). E) GZ blocks optically evoked IPSPs (reversed at -85 mV) from SST-ChR2 mice. Left: IPSPs prior to GZ application (black), at baseline (magenta) and post pairing (pink, time points indicated by arrows in Fig 1B). Right: IPSPs were significantly diminished (\*\* $p$ : 0.002) by GZ application to a stable baseline (pre, magenta) that remained post pairing (post, pink).

| Condition       | # cells,mice | PSP Amplitude (mV) |                  |                        | Norm. PSP Amplitude |                        | Norm. PSP Area   |                        |
|-----------------|--------------|--------------------|------------------|------------------------|---------------------|------------------------|------------------|------------------------|
|                 |              | Pre (5 min)        | Post (25-30 min) | p <sup>1</sup> , Power | Amp (25-30 min)     | p <sup>2</sup> , Power | Area (25-30 min) | p <sup>2</sup> , Power |
| Control         | 12, 5        | 2.8 ± 0.5          | 2.9 ± 0.5        | 0.671                  | 1.0 ± 0.1           | 0.48                   | 1.2 ± 0.1        | 0.09                   |
| Dendritic GZ    | 10, 8        | 1.1 ± 0.2          | 3.5 ± 1.1        | 0.048, <60%            | 3.4 ± 1.1           | 0.058, 60%             | 4.8 ± 1.7        | 0.047, 60%             |
| Dendritic GZ-OL | 9, 8         | 1.2 ± 0.3          | 2.6 ± 0.7        | 0.020, 70%             | 2.5 ± 0.3           | 0.005                  | 3.3 ± 0.8        | 0.027                  |
| SST-Arch        | 17, 8        | 3.0 ± 0.3          | 4.7 ± 0.5        | 0.007                  | 1.7 ± 0.2           | 0.005                  | 1.8 ± 0.2        | 0.004                  |
| SST-Arch < 2Hz  | 8, 4         | 2.7 ± 0.4          | 4.2 ± 0.8        | <0.05, 60%             | 1.7 ± 0.3           | <0.05, 66%             | 1.9 ± 0.4        | >0.05, 64%             |
| SST-Arch APV    | 8, 4         | 4.7 ± 0.9          | 3.9 ± 0.8        | 0.546                  | 0.9 ± 0.1           | >0.05                  | 0.8 ± 0.1        | 0.16                   |
| VIP-ChR2        | 10, 5        | 3.8 ± 0.8          | 5.1 ± 0.9        | 0.002                  | 1.5 ± 0.1           | 0.003                  | 1.7 ± 0.1        | 0.0001                 |
| VIP-ChR2 <2Hz   | 7, 3         | 2.6 ± 0.5          | 3.9 ± 0.6        | <0.05                  | 1.6 ± 0.1           | <0.05                  | 1.8 ± 0.1        | <0.05                  |
| VIP-ChR2 APV    | 7, 3         | 5.3 ± 1.4          | 5.3 ± 1.3        | >0.05                  | 1.0 ± 0.1           | >0.05                  | 1.0 ± 0.1        | >0.05                  |
| PV-Arch         | 13, 5        | 2.0 ± 0.3          | 2.8 ± 0.4        | 0.003                  | 1.5 ± 0.1           | 0.004                  | 1.6 ± 0.1        | 0.004                  |
| PV-Arch-APV     | 8, 3         | 3.0 ± 0.4          | 2.9 ± 0.4        | >0.05                  | 1.0 ± 0.1           | >0.05                  | 1.0 ± 0.1        | >0.05                  |
| PV-Arch <2 Hz   | 8, 4         | 1.9 ± 0.4          | 1.9 ± 0.4        | >0.05                  | 1.0 ± 0.1           | >0.05                  | 1.0 ± 0.1        | >0.05                  |
| Backpropagation | 6, 3         | 4.0 ± 0.4          | 5.6 ± 1.0        | <0.05, <60%            | 1.4 ± 0.1           | <0.05                  | 1.5 ± 0.2        | <0.05, 72%             |

**Supplemental Table 1: Synaptic properties following Induction in various conditions** Abbreviations: Amp, Amplitude; GZ, Gabazine; SST, Somatostatin; Arch, Archaeorhodopsin; APV: DL-2-Amino-5-phosphonopentanoic acid; VIP: Vasoactive intestinal polypeptide; PV, Parvalbumin; Norm., Normalized to baseline. p<sup>1</sup> P-value, paired t-test or Wilcoxon Signed Rank(WSR) test if n<10; p<sup>2</sup> P-value single distribution t-test, or WSR for n<10. All results have power >80% at a 5% significance level except where lower power is indicated. Power was calculated based in number of cells for parametric tests and may be underestimated for non-parametric tests. For WSR, P-values are cannot be accurately calculated for n<10, only >/< 0.05 is given. There was one outlier with application of Dendritic GZ, statistics are presented with (GZ) and without the outlier (GZ-OL).

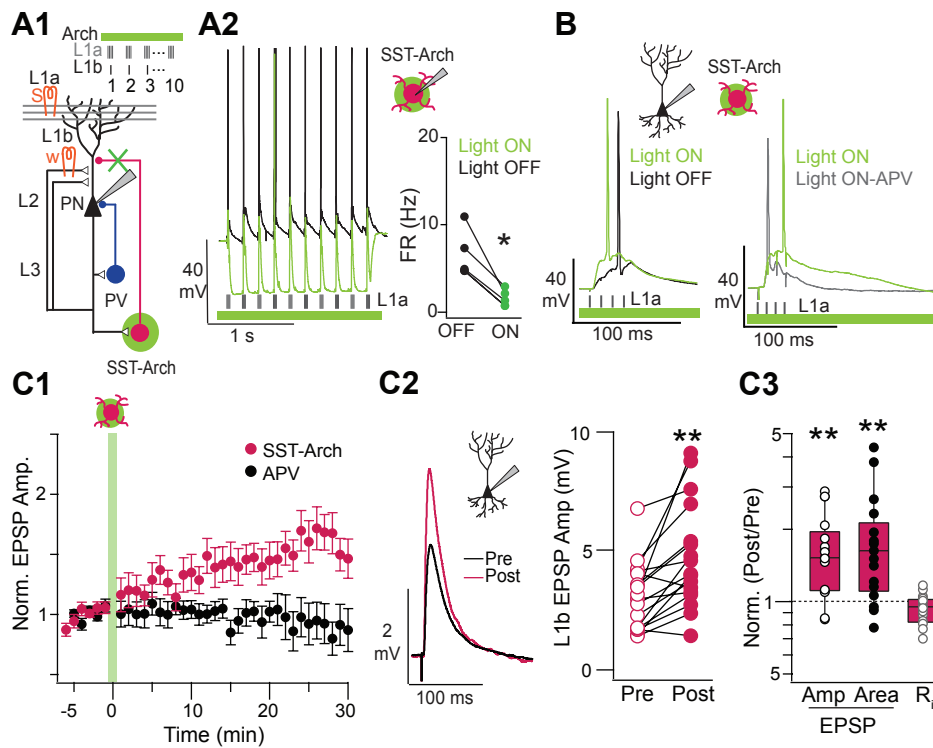

Figure 2: SST-interneuron inactivation promotes associative LTP. A1) Schematic: SST-INs express Archaeorhodopsin (Arch). A2) SST-IN responses during TBS in control (black) and inactivated (green) conditions (\* $p < 0.05$ , WSR test). B) PN responses for a single TBS burst. Left: Inactivation of SST-INs enhanced PN depolarization (green vs. black trace). Right: Depolarization during SST-IN inactivation (green) is reduced by APV (gray trace). C1) Normalized EPSP amplitude following pairing with SST-IN inactivation (magenta circles). LTP is blocked by APV (black). C2) EPSP amplitudes were enhanced post pairing (magenta trace, filled circles) compared to baseline (black trace, open circles, \*\* $p$ : 0.007, paired t-test). C3) Normalized EPSP amplitude (\*\* $p$ : 0.005) and area (\*\* $p$ : 0.004, one sample t-test) were  $>1$  post pairing.

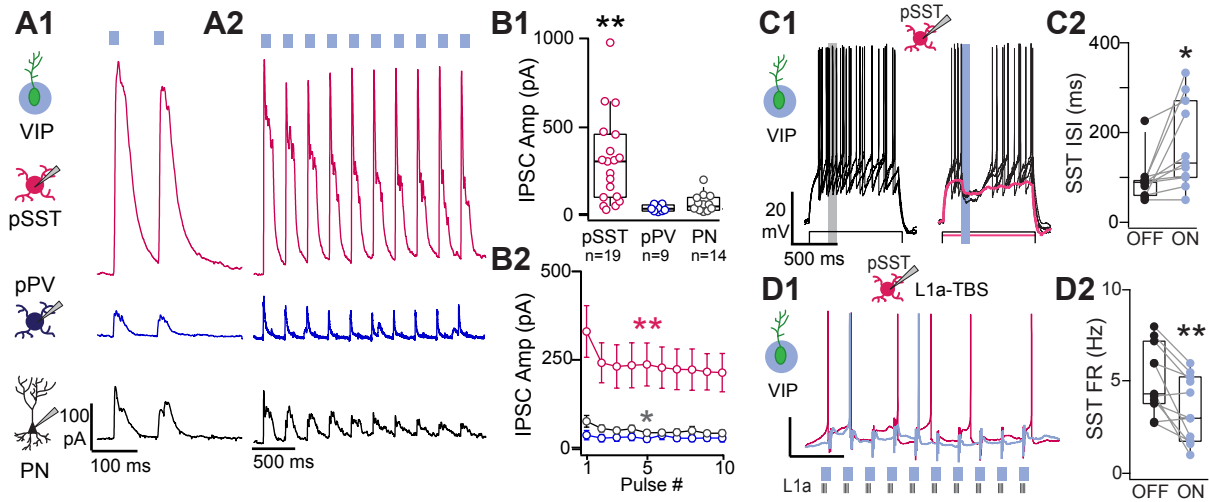

Figure 3: Inhibition by VIP-interneurons in piriform cortex. A1) VIP-INs express ChR2. Optically evoked IPSCs were recorded in putative(p) pSST-INs (magenta), pPV-INs (blue) and PNs (black). A2) Responses of the same neurons (A1) to ten light pulses (100 ms duration, 4 Hz). B1) IPSC amplitude was stronger in pSST-INs versus pPV-INs (\* $p$ :0.014) or PNs (\* $p$ :0.042, ANOVA). B2) In pSST-INs, IPSC amplitude diminishes by the 5th pulse of theta stimulation (\*\* $p$ : 0.009, paired t-test). C1) IPSCs from VIP-INs delay pSST-IN spike responses during suprathreshold depolarization (4 overlaid traces) Left: Control, Right: activation of VIP-INs (100 ms pulse, blue). Magenta trace: VIP-IN mediated IPSC during subthreshold depolarization. C2) Interspike interval (ISI) was significantly increased during optical activation of VIP-INs (blue circles,  $p$ : 0.016, paired t-test,  $n$ =11) compared to light off trials (black circles). D1) Spike responses in pSST-INs during TBS in control (magenta trace) and during pulsed light (blue trace). D2) pSST-IN firing rates decreased during TBS on light trials (blue) versus control (black circles,  $p$ :0.002, paired t-test,  $n$ =11).

|                | Intrinsic Properties |                      |               |                 | Synaptic Connectivity |               |             |               |               |
|----------------|----------------------|----------------------|---------------|-----------------|-----------------------|---------------|-------------|---------------|---------------|
|                | Condition            | R <sub>in</sub> (MΩ) | Tau (ms)      | Sag (mV)        | # recorded            | # connections | % VIP input | IPSC Amp (pA) | IPSC Amp (mV) |
| <b>pSST-G1</b> | <b>Criterion</b>     | <b>&gt;200</b>       | <b>&gt;10</b> | <b>&gt;0.75</b> |                       |               |             |               |               |
|                | Cs-Glu-Qx            | 255 ± 29             | 27 ± 1.7      | 1.4 ± 0.23      | 11                    | 10            | 91          | 190 ± 45      |               |
|                | K-Glu-Qx             | 222 ± 9.2            | 24 ± 2.2      | 1.2 ± 0.23      | 16                    | 11            | 69          | 39 ± 10       |               |
|                | K-Glu                | 312 ± 29             | 23 ± 1.9      | 2.0 ± 0.38      | 19                    | 12            | 63          |               | 2.5 ± 0.5     |
| <b>pSST-G2</b> | <b>Criterion</b>     | <b>100-200</b>       | <b>5-20</b>   | <b>0.3-0.75</b> |                       |               |             |               |               |
|                | Cs-Glu-Qx            | 135 ± 13             | 17 ± 2.0      | 0.67 ± 0.15     | 11                    | 9             | 82          | 429 ± 96      |               |
|                | K-Glu-Qx             | 143 ± 11             | 10 ± 0.9      | 0.36 ± 0.05     | 10                    | 8             | 80          | 58 ± 16       |               |
|                | K-Glu                | 110 ± 16             | 13 ± 1.2      | 0.24 ± 0.03     | 12                    | 6             | 50          |               | 1.1 ± 0.3     |
| <b>pPV</b>     | <b>Criterion</b>     | <b>50-150</b>        | <b>&lt;10</b> | <b>&lt;0.3</b>  |                       |               |             |               |               |
|                | Cs-Glu-Qx            | 106 ± 12             | 7.8 ± 0.7     | 0.1 ± 0.02      | 10                    | 9             | 90          | 35 ± 5.8      |               |
|                | K-Glu-Qx             | 63 ± 3.0             | 6.7 ± 0.4     | 0.24 ± 0.03     | 15                    | 11            | 73          | 31 ± 7.6      |               |
| <b>PN</b>      | <b>Criterion</b>     | <b>&lt;200</b>       | <b>&lt;25</b> | <b>n/a</b>      |                       |               |             |               |               |
|                | Cs-Glu-Qx            | 105 ± 5.2            | 16 ± 0.8      | 0.25 ± 0.06     | 16                    | 14            | 88          | 61 ± 14       |               |
|                | K-Glu-Qx             | 130 ± 11             | 13 ± 1.3      | 0.32 ± 0.05     | 15                    | 4             | 27          | 21 ± 7        |               |
|                | K-Glu                | 123 ± 18             | 17 ± 1.4      | 0.45 ± 0.07     | 7                     | 0             | 0           |               | 0             |

Supplemental Table 2: Inhibition mediated by VIP-Interneurons. Abbreviations: R<sub>in</sub>, Input resistance; tau, membrane time constant; Sag, sag current; Glu, gluconate; QX, QX-314 sodium channel blocker. G1-group one type SST interneurons Martinotti, low threshold spiking; G2-group 2 SST interneurons, X98 or X94 like.

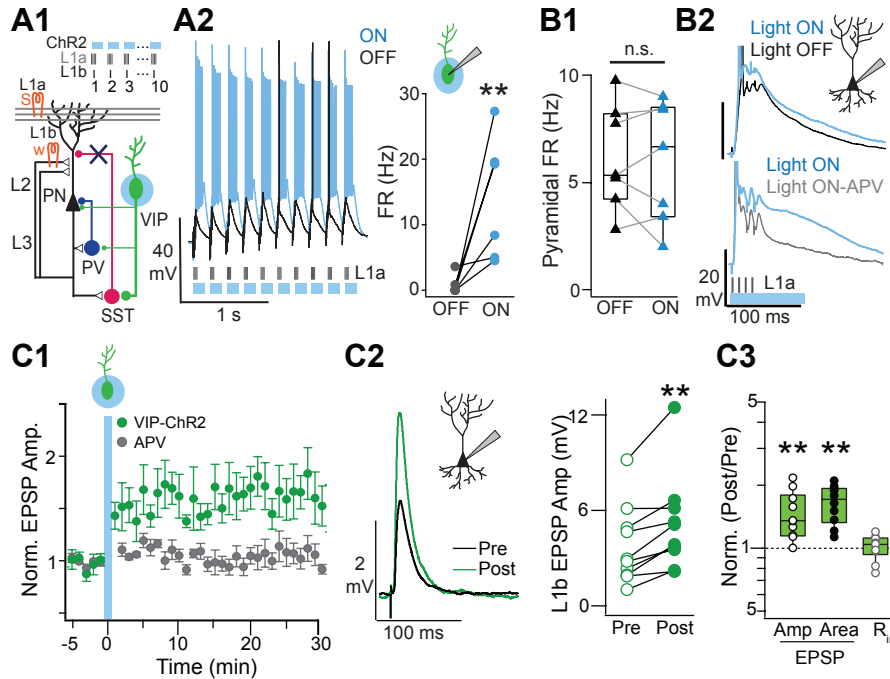

Figure 4: VIP-interneuron activation promotes associative LTP. A1) Circuit schematic: VIP-INs express ChR2 and were activated using theta pulsed light during L1a+L1b pairing. A2) VIP-IN responses during TBS without (black) and with light (blue). FRs increase during pairing with light (blue circles,  $p < 0.05$ , WSR,  $n=7$ ). B1) VIP-IN activation did not increase PN FR during pairing ( $p > 0.05$ , WSR,  $n=5$ ). B2) Top: Activation of VIP-INs enhanced PN depolarization during TBS stimulation (blue vs. black trace). Bottom: PN depolarization during VIP-IN activation (blue trace) is reduced by APV (gray trace). C1) Normalized EPSP amplitude pre and post pairing with VIP-IN activation (green circles). LTP is blocked by APV (black). C2) EPSP amplitudes were enhanced 25 min post pairing (green trace, filled circles) compared to baseline (black trace, open circles,  $**p: 0.002$ , paired t-test). C3) Normalized EPSP amplitude ( $**p: 0.003$ ) and area ( $**p: 0.0001$ , one sample t-test) were  $>1$  post pairing.

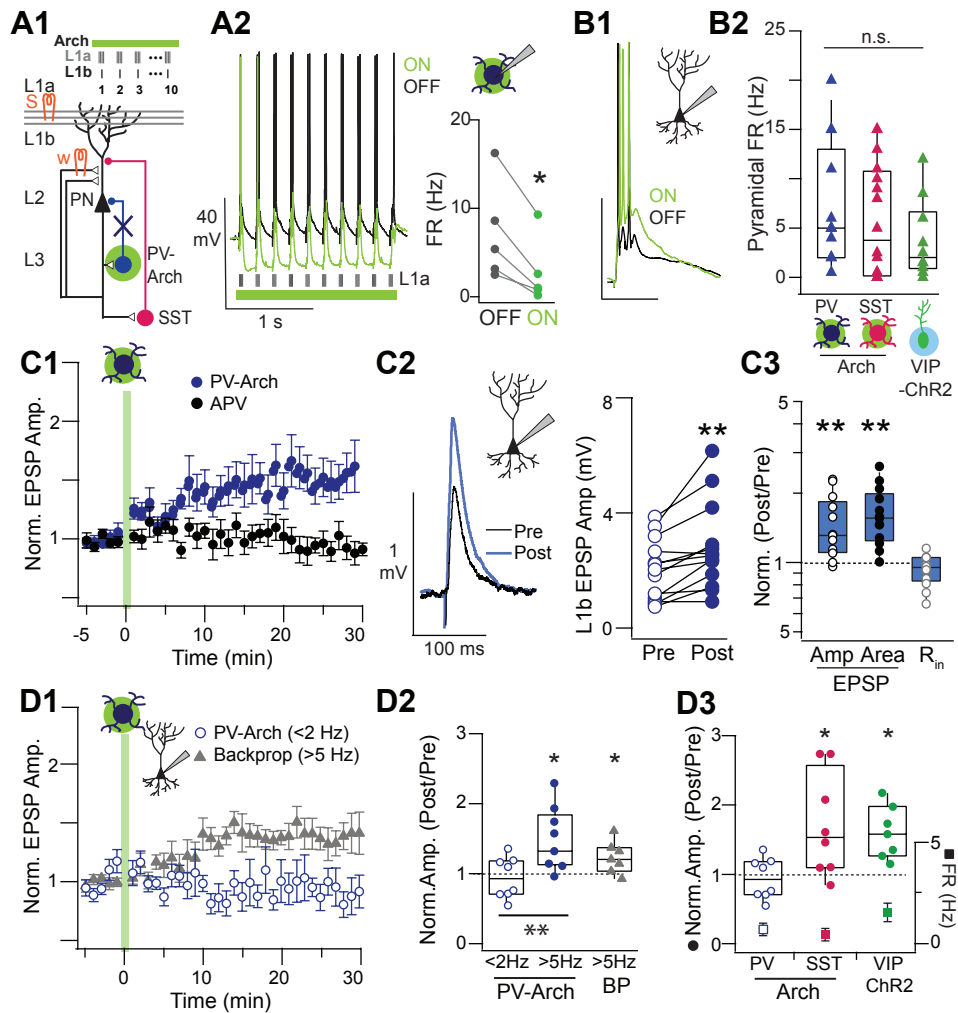

Figure 5: PV-interneuron inactivation during induction promotes associative LTP.

A1) Schematic of inactivation of PV-Arch interneurons during induction. A2) Decreased PV-IN spiking during inactivation (green) compared to control (black, \* $p < 0.05$ , WSR,  $n = 5$ ). B1) PV-IN inactivation enhanced PN depolarization during TBS (green vs. black trace). B2) PN firing rates during induction with PV-IN (blue) or SST-IN (magenta) inactivation or VIP-IN activation (green). C1) Normalized EPSP amplitude with PV-IN inactivation (blue) or inactivation plus APV (black). C2) Enhancement of EPSP amplitude 25-30 min post induction (blue trace, filled circles) compared to baseline (black trace, open circles, \*\* $p = 0.003$ , paired t-test). C3) Normalized EPSP amplitude (\*\* $p = 0.004$ ) and area (\*\* $p = 0.004$ , 1 sample t-test) were  $> 1$ . D1) Normalized EPSP amplitude in two conditions- 1) inhibition intact and evoked backpropagating APs in the PN during induction (FR  $> 5$  Hz, gray triangles,  $n = 6$ ) and 2) PV-IN inactivation and PN FR  $< 2$  Hz during induction (open blue circles,  $n = 8$ ). D2) Normalized EPSP amplitude 25-30 min post induction with PV-IN inactivation for low PN FR ( $< 2$  Hz, open circles), high PN FR ( $> 5$  Hz, solid circles, \*  $p < 0.05$ ) or evoked backpropagation (BP  $> 5$  Hz, gray triangles, \*  $p < 0.05$ , WSR). D3) Normalized EPSP amplitude 25-30 min post induction (left axis) conditioned on  $< 2$  Hz FR in PN (right axis, squares). Shown for PV-IN inactivation (open blue circles), SST-IN inactivation, (solid magenta, \*  $p < 0.05$ , WSR) or VIP-IN activation (green circles, \*  $p < 0.05$ , WSR). Average FR shown for each group (right axis, mean  $\pm$  SD, squares).
